# Supplementary material for: Inflammatory Eicosanoids Increase Amyloid Precursor Protein Expression via Activation of Multiple Neuronal Receptors
Source: PubMed Central journal article supplement (PMC4682150; doi:10.1038/srep18286), 2015-12-17
Supplement: srep18286-s1.pdf [file srep18286-s1.pdf]

**Supplementary Information**

**Inflammatory Eicosanoids Increase Amyloid Precursor Protein Expression via Activation of Multiple Neuronal Receptors**

**Herbst-Robinson K.J., Liu L., James M., Yao Y., Xie S., and Brunden K.R.**

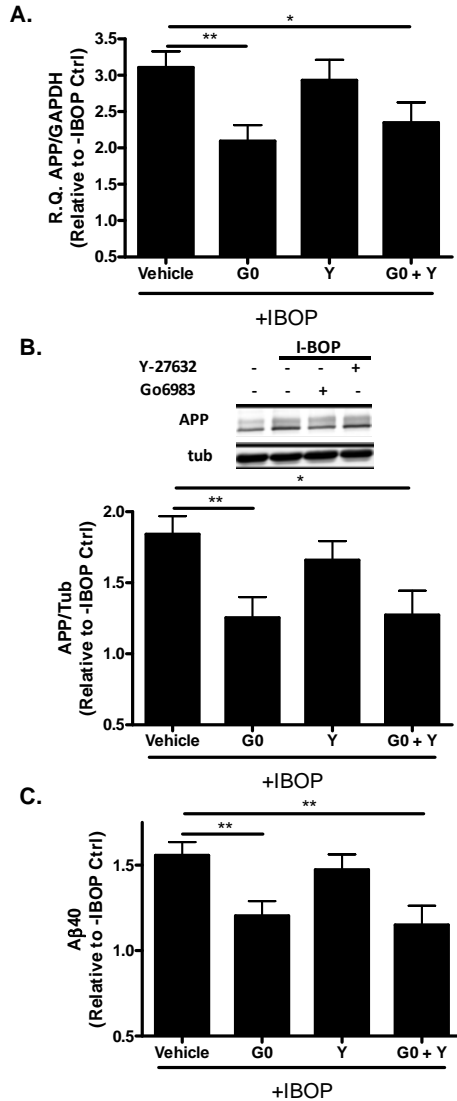

**Supplementary Figure 1.** PKC inhibition blocks TP receptor-mediated increases in APP and A $\beta$ . (a-c) hTP-hAPP cells were pre-incubated with the pan PKC inhibitor, Go6983 (Go; 1  $\mu$ M) or the ROCK inhibitor, Y-27632 (Y; 10  $\mu$ M) in the presence of IBOP. (a) The IBOP-induced increase in APP mRNA was attenuated in the presence of Go6983, but not Y-27632 [R.Q. values of APP/GAPDH are relative to non-IBOP-treated control cells]. (b) The IBOP-induced increase in APP protein expression was attenuated by pretreatment with Go6983, but not Y-27632. A representative blot is included with quantification of APP expression, with values relative to non-IBOP-treated control cells, with normalization to  $\alpha$ -tubulin. (c) The increase in A $\beta$ 1-40 release into medium induced by IBOP treatment was decreased in the presence of Go6983, but not Y-27632 [values are relative to non-IBOP-treated control cells, normalized to total cellular protein content]. Statistical analyses consisted of a mixed-effects model, with values representing estimates from the least squares means fit of the mixed procedure from 2-3 independent studies with 2-5 replicates per study for A. and B., and 3-9 replicates per study for C. Error bars represent SEM; \*,  $p < 0.05$ ; \*\*,  $p < 0.01$ ;

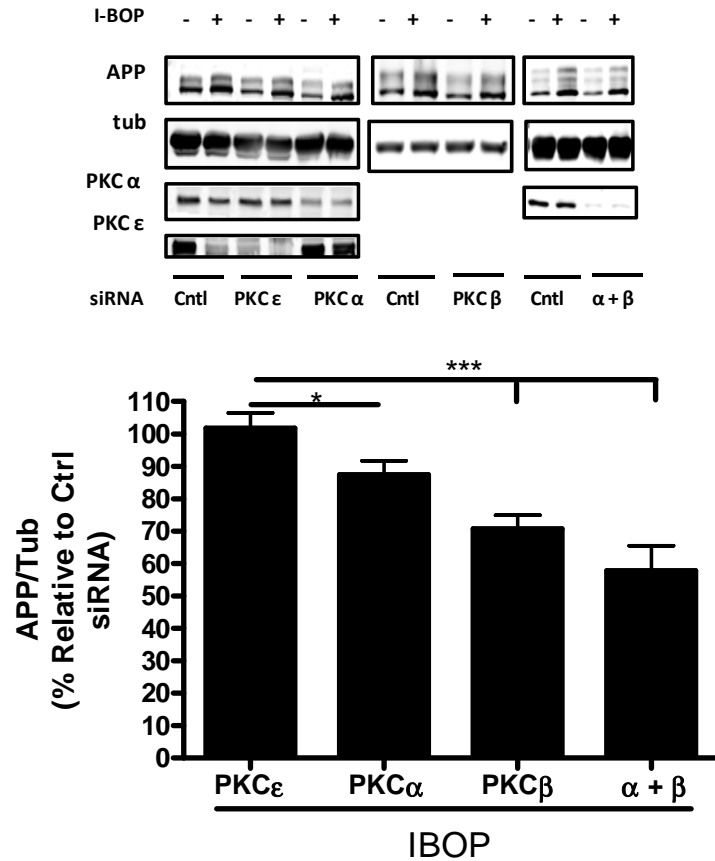

**Supplementary Figure 2.** Conventional PKC isoforms regulate APP expression. hTP-hAPP cells were transfected with 50 nM of control siRNA or siRNA against PKC $\epsilon$ , PKC $\alpha$ , and/or PKC $\beta$  and grown for 72 h, with IBOP (10 nM) added over the last 48 h. Only those cells treated with PKC $\alpha$  and/or PKC $\beta$  siRNA showed a reduction of IBOP-induced APP protein expression [(top) representative blot and (bottom) quantification of APP with values relative to cells treated with control siRNA and IBOP, with normalization to  $\alpha$ -tubulin]. Statistical analyses consisted of a mixed-effects model, with values representing estimates from the least squares means fit of the mixed procedure from two independent studies with 2-3 replicates per study, except for the combined PKC $\alpha$  + PKC $\beta$  knockdown, which was conducted in a single experiment with 2 replicate samples. Error bars represent SEM; \*,  $P < 0.05$ ; \*\*\*,  $P < 0.001$ .

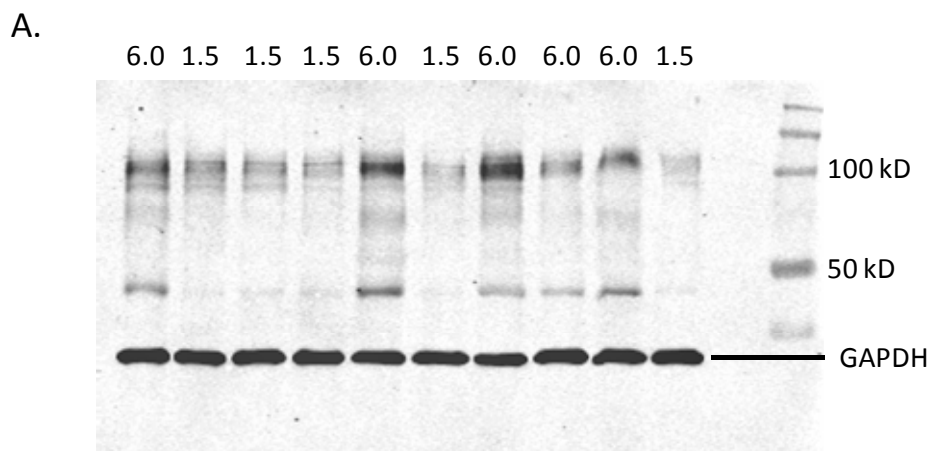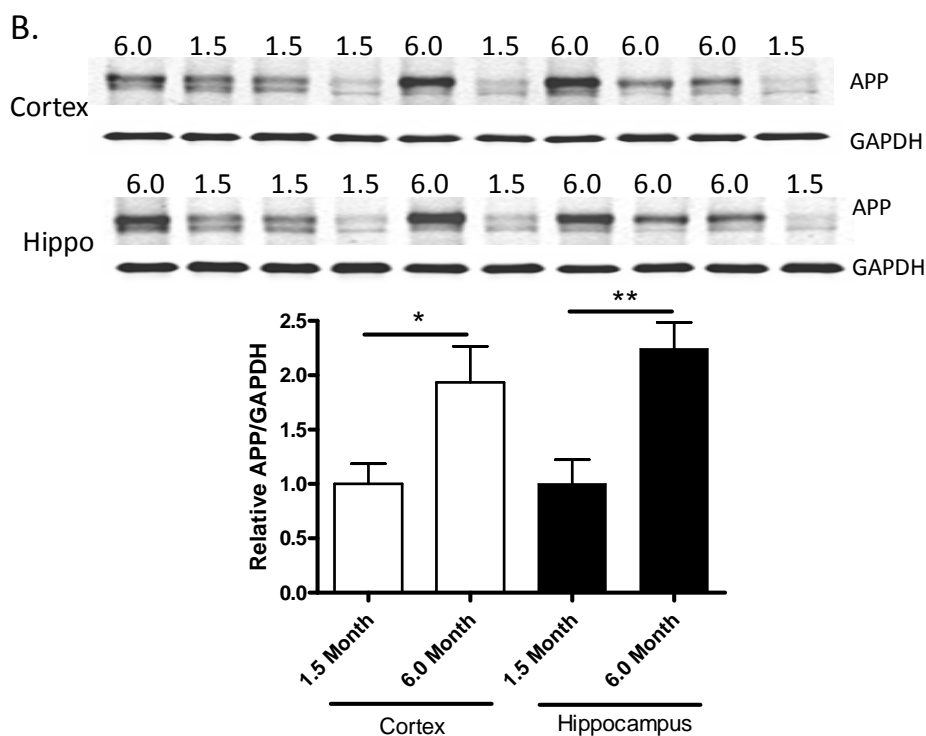

**Supplementary Figure 3.** Aged 5XFAD mice show increased levels of total APP species. Brain homogenates from 5XFAD mice that were 1.5 or 6.0 months of age (3 males and 2 females/group) underwent immunoblot analysis for determination of APP levels. (A) Full 22C11 antibody immunoblot image of hippocampal samples, as shown in Figure 6C. Intact APP and sAPP species have an apparent molecular weight of ~95-110 kD<sup>31</sup>. The blot was also probed with a GAPDH antibody. (B) A second amino-terminal APP antibody (Karen) also reveals a significant increase of APP species in the cortex and hippocampus of 6.0-month old 5XFAD mice. Lane loading order in the immunoblots are as in Figure 6. Statistical analyses consisted of a two-tailed t-test. Error bars represent SEM ; \*,  $p < 0.05$ ; \*\*,  $p < 0.01$ .

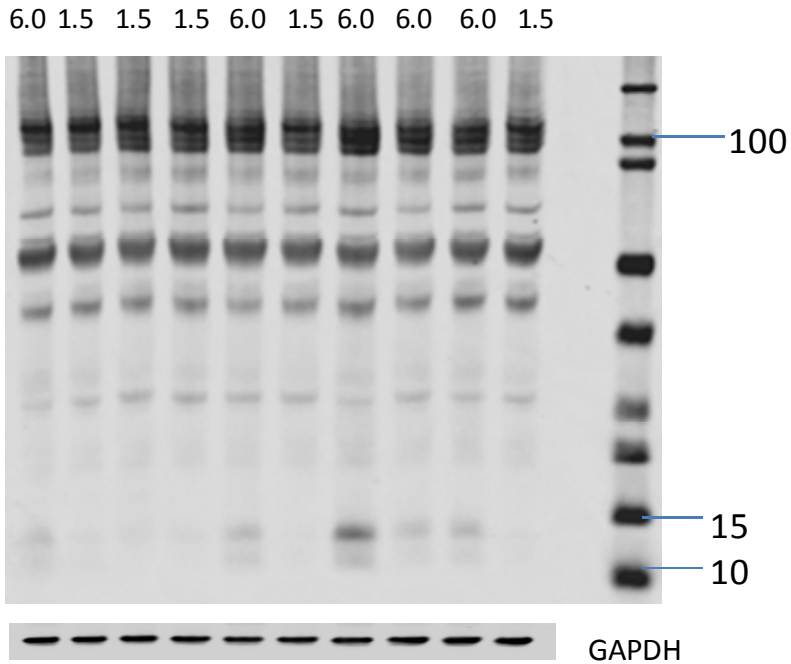

**Supplementary Figure 4.** Photo of the complete immunoblot obtained from cortical homogenates of 1.5-month old and 6.0-month old 5XFAD mice after SDS-PAGE on a 4-12% gradient gel and probing with APP 5685 antibody. Intact APP species (immature and mature) run as multiple species of ~95-110 kD, whereas the APP C99 and C83 COOH-terminal fragments run with apparent molecular weights between 12-14 kD (see <sup>31</sup>). Additional bands correspond to truncated APP and/or non-specific bands that are observed with multiple APP antibodies.

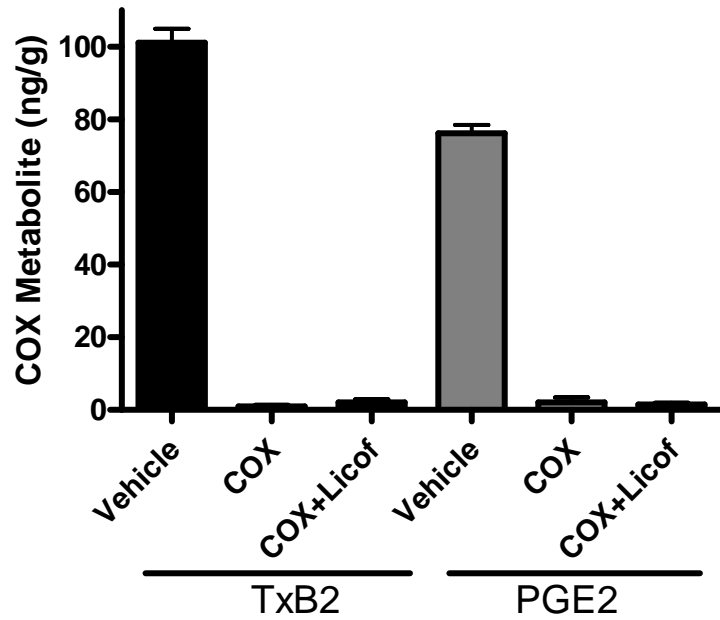

**Supplementary Figure 5.** Inhibition of TxB2 and PGE2 production in aged 5XFAD mice. The concentration of brain TxB2 and PGE2 were assessed in 5.5-6.0-month old 5XFAD mice after 7 days of oral dosing via drinking water with the combination of SC-560 and rofecoxib (COX) or SC-560 and rofecoxib supplemented with licofelone (COX + Licof). A total of 3-9 mice were analyzed from each treatment group. Error bars represent SEM.

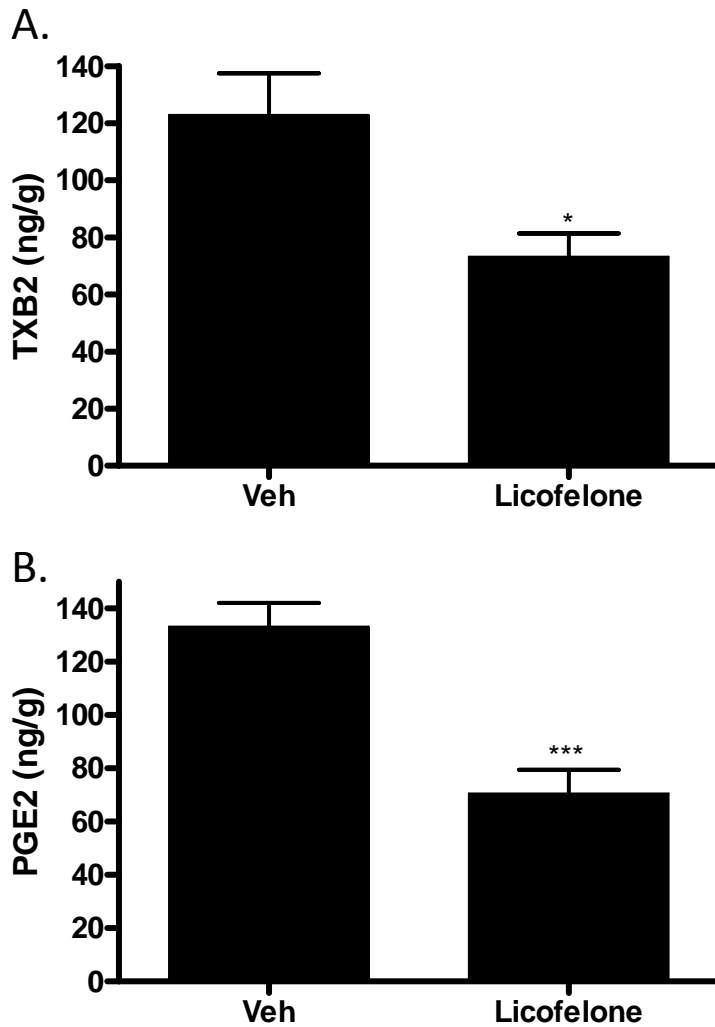

**Supplementary Figure 6.** Licofelone reduces TxB2 and PGE2 levels in aged 5XFAD mice. 5XFAD mice (5.5-6.0 months of age) were administered 0.7 mg/ml of licofelone suspended in drinking water containing 3% PEG, 0.5% methylcellulose and 10% sucrose, or vehicle alone. After 3 days of administration, the levels of TxB2 (**A**) or PGE2 (**B**) in the cortex were evaluated by LC-MS/MS. Assessment of brain licofelone concentration upon study completion revealed an average exposure of 0.60 +/- 0.30  $\mu$ M. Statistical analyses consisted of a two-tailed t-test, with n=7 (2 males and 5 females) in each group. Error bars represent SEM; \*, p<0.05; \*\*\*, p<0.001.

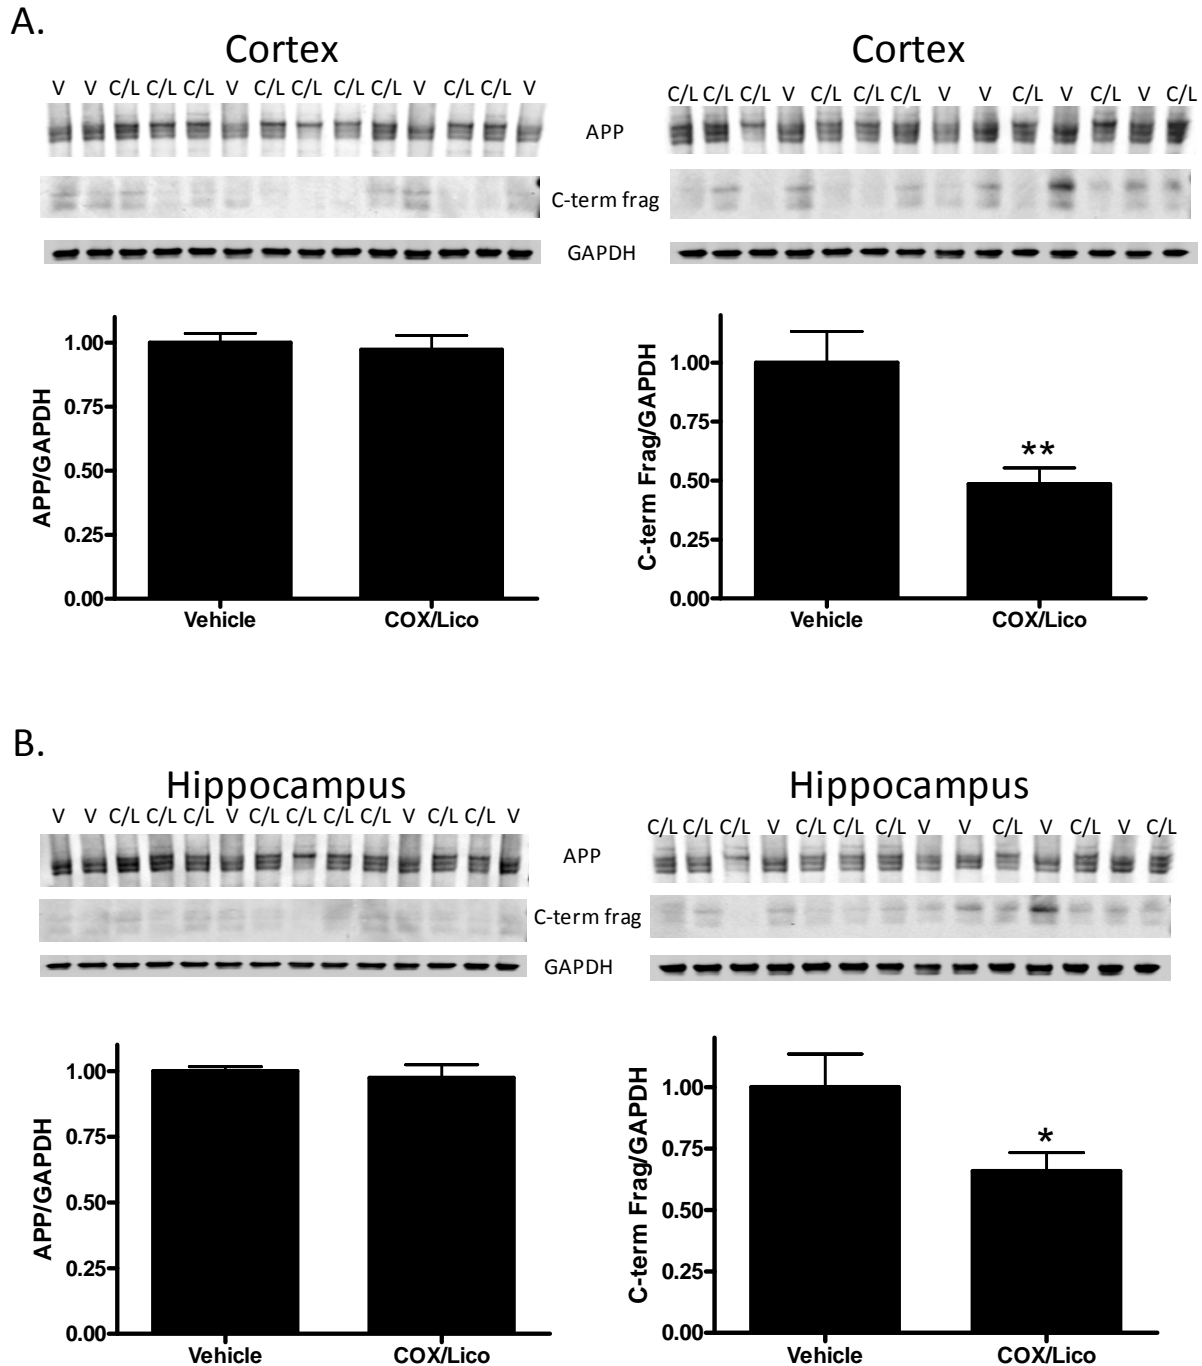

**Supplementary Figure 7.** COOH-terminal APP antibody (5685) reveals a reduction of COOH-terminal APP fragments, but not intact APP, upon treatment with COX/Licof. Cortical (A) and hippocampal (B) homogenate samples from vehicle- and COX/Licof-treated aged 5XFAD mice (same samples analyzed with 22C11 antibody in Figure 8) were run on a 4-12% gradient gel and probed with the 5685 antibody. Statistical analyses consisted of a one-way ANOVA with a Tukey's multiple comparison test. Error bars represent SEM ; \*,  $p < 0.05$ ; \*\*,  $p < 0.01$ ;  $n = 9-10$  per treatment.



**A.**

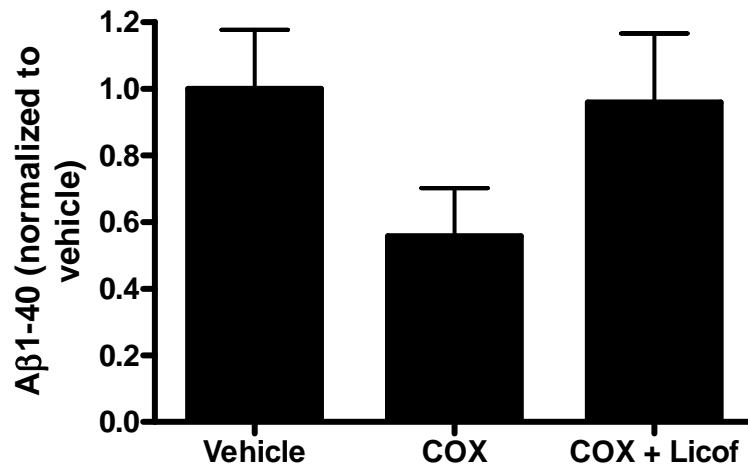

**B.**

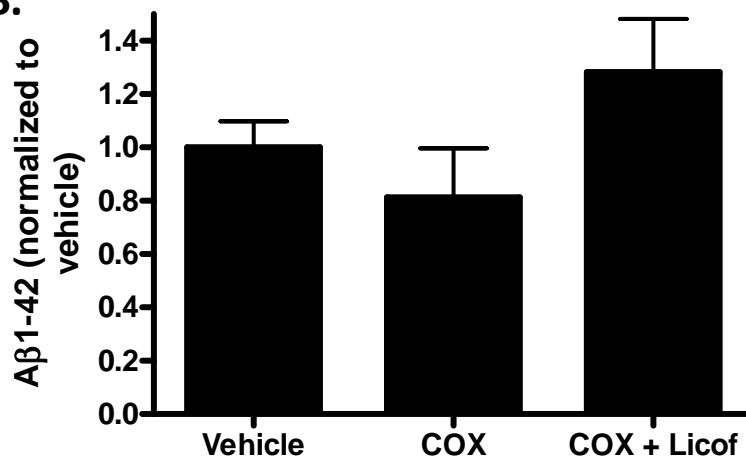

**Supplementary Figure 8.** Total Aβ levels in drug-treated aged 5XFAD mice. Aβ1-40 (**A**) and Aβ1-42 (**B**) levels were determined by ELISA in 2% SDS cortical brain homogenates prepared from 5.5-6.0 month old 5XFAD mice after 7 days of oral dosing via drinking water with vehicle, the combination of SC-560 and rofecoxib (COX), or SC-560 and rofecoxib supplemented with licoferone (COX + Licof). Brains were from the mice described in Figure 8 (n=9-10/group). Error bars represent SEM.

| siRNA           | mRNA           | Protein         |
|-----------------|----------------|-----------------|
| G $\alpha_q$    | 97.4 +/- 0.5 % | 58.5 +/- 7.4 %  |
| G $\alpha_{12}$ | 84.0 +/- 2.0 % | 57.7 +/- 23.6 % |
| G $\alpha_{13}$ | 78.6 +/-10.9 % | 92.3 +/- 1.3 %  |

**Supplementary Table 1.** Knockdown of G $\alpha$  proteins. hTP-hAPP cells were transfected with 50 nM of control siRNA or siRNA directed against G $\alpha_q$ , G $\alpha_{12}$ , or G $\alpha_{13}$  for 24 h prior to subsequent incubation in the absence or presence of IBOP. The extent of G $\alpha$  mRNA and protein knockdown were determined by qRT-PCR (n=3 replicate samples from a single experiment) and immunoblot analyses (n=4-6 replicate samples from a single experiment). Data are expressed as percent knockdown +/- SD.

| siRNA                         | mRNA                             | Protein                |
|-------------------------------|----------------------------------|------------------------|
| PKC $\epsilon$                | N.D.                             | 71.7 +/- 13.3 %        |
| PKC $\alpha$                  | 89.7 +/- 1.3 %                   | 76.1 +/- 10.6 %        |
| PKC $\beta$                   | 94.4 +/- 0.6 %                   | N.D.                   |
| PKC $\alpha$ +<br>PKC $\beta$ | 94.4 +/- 1.6 %<br>87.5 +/- 1.1 % | 90.1 +/- 2.2 %<br>N.D. |

**Supplementary Table 2.** Knockdown of PKC isoforms. hTP-hAPP cells were transfected with 50 nM of control siRNA or siRNA directed against PKC $\epsilon$ , PKC $\alpha$ , and/or PKC $\beta$ , and qRT-PCR and immunoblot analyses were performed to determine the efficiency of PKC isoform knockdown after 72 h in culture. Data are from 1-2 independent experiments with 3 replicate samples per experiment, with the results expressed as percent knockdown +/-SD. N. D. = not determined.

| Receptor | Mock-transfected Ct | Receptor-transfected Ct |
|----------|---------------------|-------------------------|
| EP1      | 32.7 +/- 0.07       | 25.3 +/- 0.13           |
| EP3      | 31.1 +/- 0.21       | 26.7 +/- 0.20           |
| CysLT1   | >36                 | 20.3 +/- 0.80           |
| BLT1     | 35.4 +/- 0.36       | 25.1 +/- 0.24           |

**Supplementary Table 3.** Expression of eicosanoid receptors in hAPP-expressing QBI293 cells. RNA samples from mock-transfected cells and cells transfected with individual receptor cDNA were subjected to qRT-PCR analysis using receptor-specific primers, with the cycle threshold shown for each population of cells. A lower cycle threshold is indicative of more RNA. The GAPDH cycle threshold values for all samples were within 0.5 cycles of each other, indicative of equal loading of total mRNA in each sample. Three replicate samples from a single transfection of each receptor cDNA were analyzed, and the difference between the mock- and receptor-transfected Ct values were compared.

| Treatment                       | SC-560 (nM) | Rofecoxib (nM) | Licofelone (nM) | Daily Water (ml)  | BW -Start (g) | BW - End (g) | BW Change (g) |
|---------------------------------|-------------|----------------|-----------------|-------------------|---------------|--------------|---------------|
| SC-560 + Rofecoxib              | 536 +/- 193 | 419 +/- 204    | NA              | 7.0 +/- 1.3**     | 32.6 +/- 7.7  | 31.9 +/- 7.7 | -0.7 +/- 1.1  |
| SC-560 + Rofecoxib + Licofelone | 225 +/- 61  | 64 +/- 47      | 573 +/- 249     | 2.8 +/- 0.1***, † | 26.8 +/- 5.7  | 25.6 +/- 4.6 | -1.2 +/- 1.9  |
| Vehicle                         | NA          | NA             | NA              | 9.6 +/- 2.5       | 29.2 +/- 4.8  | 29.0 +/- 5.1 | -0.2 +/- 1.1  |

**Supplementary Table 4.** The average concentrations and standard deviations of COX and 5-LOX inhibitors in the brains of the 5XFAD mice used to evaluate APP levels after oral dosing via drinking water for 7 days. As the drinking solutions were sweetened with sucrose to reduce compound-induced taste aversion, the vehicle-treated mice consumed more than the ~5 ml of water typically ingested by mice per day. The mice receiving drugs consumed less water per day on average than the vehicle-treated 5XFAD mice, and those receiving the combination of SC-560 + Rofecoxib + licofelone drank significantly less than the SC-560 + Rofecoxib group. However, differences in drinking water consumption among treatment groups did not result in significant differences in body weight (BW) change during the study, and there were not significant differences in group body weights at the start or the end of the study. Statistical analyses consisted of a one-way ANOVA, with a Tukey's multiple comparison test. \*\*, p<0.01; \*\*\*, p<0.001 relative to the vehicle group; †, p<0.001 relative to the SC-560 + Rofecoxib group. NA = not applicable.

## Supplemental Statistical Information

| Figure 1A. Differences of Least Squares Means |       |           |          |                |    |         |         |       |         |         |
|-----------------------------------------------|-------|-----------|----------|----------------|----|---------|---------|-------|---------|---------|
| Effect                                        | treat | _treat    | Estimate | Standard Error | DF | t Value | Pr >  t | Alpha | Lower   | Upper   |
| treat                                         | 1:Gq  | 2:G12     | -1.1757  | 0.3261         | 11 | -3.61   | 0.0041  | 0.05  | -1.8934 | -0.4580 |
| treat                                         | 1:Gq  | 3:G13     | -1.4583  | 0.3059         | 11 | -4.77   | 0.0006  | 0.05  | -2.1316 | -0.7850 |
| treat                                         | 1:Gq  | 4:Control | -1.4134  | 0.2631         | 11 | -5.37   | 0.0002  | 0.05  | -1.9926 | -0.8342 |
| treat                                         | 2:G12 | 3:G13     | -0.2826  | 0.3325         | 11 | -0.85   | 0.4134  | 0.05  | -1.0144 | 0.4491  |
| treat                                         | 2:G12 | 4:Control | -0.2377  | 0.2936         | 11 | -0.81   | 0.4353  | 0.05  | -0.8839 | 0.4085  |
| treat                                         | 3:G13 | 4:Control | 0.04492  | 0.2703         | 11 | 0.17    | 0.8710  | 0.05  | -0.5499 | 0.6398  |

  

| Figure 1B. Differences of Least Squares Means |       |           |          |                |    |         |         |       |         |         |
|-----------------------------------------------|-------|-----------|----------|----------------|----|---------|---------|-------|---------|---------|
| Effect                                        | treat | _treat    | Estimate | Standard Error | DF | t Value | Pr >  t | Alpha | Lower   | Upper   |
| treat                                         | 1:Gq  | 2:G12     | -1.0292  | 0.4122         | 15 | -2.50   | 0.0247  | 0.05  | -1.9079 | -0.1506 |
| treat                                         | 1:Gq  | 3:G13     | -0.8456  | 0.4122         | 15 | -2.05   | 0.0581  | 0.05  | -1.7242 | 0.03305 |
| treat                                         | 1:Gq  | 4:Control | -1.1933  | 0.3480         | 15 | -3.43   | 0.0037  | 0.05  | -1.9351 | -0.4515 |
| treat                                         | 2:G12 | 3:G13     | 0.1837   | 0.4389         | 15 | 0.42    | 0.6815  | 0.05  | -0.7518 | 1.1191  |
| treat                                         | 2:G12 | 4:Control | -0.1640  | 0.3795         | 15 | -0.43   | 0.6717  | 0.05  | -0.9728 | 0.6448  |
| treat                                         | 3:G13 | 4:Control | -0.3477  | 0.3795         | 15 | -0.92   | 0.3740  | 0.05  | -1.1565 | 0.4611  |

| Figure 2A. Differences of Least Squares Means |             |            |          |                |    |         |         |       |         |         |
|-----------------------------------------------|-------------|------------|----------|----------------|----|---------|---------|-------|---------|---------|
| Effect                                        | treat       | _treat     | Estimate | Standard Error | DF | t Value | Pr >  t | Alpha | Lower   | Upper   |
| treat                                         | 1:P + G + I | 2:P + G0   | 0.08358  | 0.2461         | 9  | 0.34    | 0.7419  | 0.05  | -0.4731 | 0.6402  |
| treat                                         | 1:P + G + I | 3:P + Iono | -1.2786  | 0.2503         | 9  | -5.11   | 0.0006  | 0.05  | -1.8448 | -0.7123 |
| treat                                         | 1:P + G + I | 4:PMA      | -0.7712  | 0.2359         | 9  | -3.27   | 0.0097  | 0.05  | -1.3048 | -0.2375 |
| treat                                         | 2:P + G0    | 3:P + Iono | -1.3621  | 0.2248         | 9  | -6.06   | 0.0002  | 0.05  | -1.8707 | -0.8536 |
| treat                                         | 2:P + G0    | 4:PMA      | -0.8548  | 0.2087         | 9  | -4.10   | 0.0027  | 0.05  | -1.3268 | -0.3827 |
| treat                                         | 3:P + Iono  | 4:PMA      | 0.5074   | 0.2131         | 9  | 2.38    | 0.0412  | 0.05  | 0.02530 | 0.9894  |

  

| Figure 2B. Differences of Least Squares Means |           |             |          |                |    |         |         |       |          |         |
|-----------------------------------------------|-----------|-------------|----------|----------------|----|---------|---------|-------|----------|---------|
| Effect                                        | treat     | _treat      | Estimate | Standard Error | DF | t Value | Pr >  t | Alpha | Lower    | Upper   |
| treat                                         | 4:PMA     | 5:PMA + G   | 0.6377   | 0.2403         | 16 | 2.65    | 0.0173  | 0.05  | 0.1284   | 1.1470  |
| treat                                         | 4:PMA     | 6:PMA + I   | -0.4684  | 0.1699         | 16 | -2.76   | 0.0140  | 0.05  | -0.8285  | -0.1082 |
| treat                                         | 4:PMA     | 7:P + I + G | 0.3279   | 0.1899         | 16 | 1.73    | 0.1035  | 0.05  | -0.07471 | 0.7306  |
| treat                                         | 5:PMA + G | 6:PMA + I   | -1.1061  | 0.2403         | 16 | -4.60   | 0.0003  | 0.05  | -1.6154  | -0.5967 |
| treat                                         | 5:PMA + G | 7:P + I + G | -0.3098  | 0.2548         | 16 | -1.22   | 0.2418  | 0.05  | -0.8500  | 0.2305  |
| treat                                         | 6:PMA + I | 7:P + I + G | 0.7963   | 0.1899         | 16 | 4.19    | 0.0007  | 0.05  | 0.3936   | 1.1990  |

  

| Figure 2C. Differences of Least Squares Means |             |           |          |                |    |         |         |       |          |         |
|-----------------------------------------------|-------------|-----------|----------|----------------|----|---------|---------|-------|----------|---------|
| Effect                                        | treat       | _treat    | Estimate | Standard Error | DF | t Value | Pr >  t | Alpha | Lower    | Upper   |
| treat                                         | 1:P + G + I | 4:PMA     | -0.6529  | 0.1524         | 21 | -4.28   | 0.0003  | 0.05  | -0.9698  | -0.3359 |
| treat                                         | 1:P + G + I | 5:PMA + G | 0.2574   | 0.1603         | 21 | 1.61    | 0.1232  | 0.05  | -0.07591 | 0.5908  |
| treat                                         | 1:P + G + I | 6:PMA + I | -0.6151  | 0.1803         | 21 | -3.41   | 0.0026  | 0.05  | -0.9901  | -0.2401 |
| treat                                         | 4:PMA       | 5:PMA + G | 0.9103   | 0.1284         | 21 | 7.09    | <.0001  | 0.05  | 0.6433   | 1.1773  |
| treat                                         | 4:PMA       | 6:PMA + I | 0.03772  | 0.1624         | 21 | 0.23    | 0.8185  | 0.05  | -0.2999  | 0.3754  |
| treat                                         | 5:PMA + G   | 6:PMA + I | -0.8726  | 0.1679         | 21 | -5.20   | <.0001  | 0.05  | -1.2217  | -0.5235 |

| Figure 3A. Two-Tailed Unpaired T-Test                       |         |           |                   |                  |
|-------------------------------------------------------------|---------|-----------|-------------------|------------------|
|                                                             | P value | t, df     | F-test            | variance p value |
| EP1 Veh vs. 17PGE2                                          | 0.0023  | 6.904, 4  | 0.261             |                  |
| EP3 Veh vs. 17PGE2                                          | 0.0007  | 9.418, 4  | 0.587             |                  |
| CysLT1 Veh vs. LTD4                                         | 0.0025  | 6.738, 4  | 0.338             |                  |
| BLT1 Veh vs. LTB4                                           | 0.746   | 0.347, 4  | 0.743             |                  |
| Figure 3B. Two-Tailed Unpaired T-Test                       |         |           |                   |                  |
|                                                             | P value | t, df     | F-test            | variance p value |
| EP1 Veh vs. 17PGE2                                          | 0.0198  | 3.760, 4  | 0.106             |                  |
| EP3 Veh vs. 17PGE2                                          | 0.0097  | 4.645, 4  | 0.799             |                  |
| CysLT1 Veh vs. LTD4                                         | 0.1024  | 2.111, 4  | 0.444             |                  |
| BLT1 Veh vs. LTB4                                           | 0.7027  | 0.4101, 4 | 0.795             |                  |
| Figure 3C. Two-Tailed Unpaired T-Test and One-Sample T-Test |         |           |                   |                  |
|                                                             | P value | t, df     | F-test            | variance p value |
| EP1 Veh vs. 17PGE2                                          | 0.004   | 40420, 16 | 0.671             |                  |
| EP3 Veh vs. 17PGE2                                          | <0.0001 | 10.74, 15 | 0.629             |                  |
| CysLT1 Veh vs. LTD4                                         | <0.0001 | 17.117, 8 | One-sample t-test |                  |

| Figure 4A. Differences of Least Squares Means |              |              |          |                |    |         |         |       |          |        |
|-----------------------------------------------|--------------|--------------|----------|----------------|----|---------|---------|-------|----------|--------|
| Effect                                        | treat        | _treat       | Estimate | Standard Error | DF | t Value | Pr >  t | Alpha | Lower    | Upper  |
| treat                                         | 1:IBOP       | 2:IBOP+51280 | 0.5660   | 0.1293         | 24 | 4.38    | 0.0002  | 0.05  | 0.2991   | 0.8330 |
| treat                                         | 1:IBOP       | 8:Control    | 0.7590   | 0.1293         | 24 | 5.87    | <.0001  | 0.05  | 0.4920   | 1.0259 |
| treat                                         | 2:IBOP+51280 | 8:Control    | 0.1930   | 0.1293         | 24 | 1.49    | 0.1487  | 0.05  | -0.07398 | 0.4599 |
| Figure 4B. Differences of Least Squares Means |              |              |          |                |    |         |         |       |          |        |
| Effect                                        | treat        | _treat       | Estimate | Standard Error | DF | t Value | Pr >  t | Alpha | Lower    | Upper  |
| treat                                         | 3:LTD4       | 4:LTD4 +Pran | 0.3520   | 0.1027         | 24 | 3.43    | 0.0022  | 0.05  | 0.1400   | 0.5640 |
| treat                                         | 3:LTD4       | 8:Control    | 0.5123   | 0.1027         | 24 | 4.99    | <.0001  | 0.05  | 0.3003   | 0.7243 |
| treat                                         | 4:LTD4 +Pran | 8:Control    | 0.1603   | 0.1027         | 24 | 1.56    | 0.1317  | 0.05  | -0.05170 | 0.3723 |
| Figure 4C. Differences of Least Squares Means |              |              |          |                |    |         |         |       |          |        |
| Effect                                        | treat        | _treat       | Estimate | Standard Error | DF | t Value | Pr >  t | Alpha | Lower    | Upper  |
| treat                                         | 5:PGE        | 6:PGE + ONO  | -0.05214 | 0.1355         | 24 | -0.38   | 0.7038  | 0.05  | -0.3319  | 0.2276 |
| treat                                         | 5:PGE        | 8:Control    | 0.5650   | 0.1355         | 24 | 4.17    | 0.0003  | 0.05  | 0.2853   | 0.8447 |
| treat                                         | 6:PGE + ONO  | 8:Control    | 0.6171   | 0.1355         | 24 | 4.55    | 0.0001  | 0.05  | 0.3374   | 0.8968 |
| Figure 4D. Differences of Least Squares Means |              |              |          |                |    |         |         |       |          |        |
| Effect                                        | treat        | _treat       | Estimate | Standard Error | DF | t Value | Pr >  t | Alpha | Lower    | Upper  |
| treat                                         | 5:PGE        | 7:PGE + L    | 0.5337   | 0.1723         | 24 | 3.10    | 0.0049  | 0.05  | 0.1781   | 0.8894 |
| treat                                         | 5:PGE        | 8:Control    | 0.7174   | 0.1723         | 24 | 4.16    | 0.0003  | 0.05  | 0.3617   | 1.0730 |
| treat                                         | 7:PGE + L    | 8:Control    | 0.1836   | 0.1723         | 24 | 1.07    | 0.2972  | 0.05  | -0.1720  | 0.5392 |

**Figure 5A. Differences of Least Squares Means**

| Effect | treat   | _treat    | Estimate | Standard Error | DF | t Value | Pr >  t | Alpha | Lower   | Upper  |
|--------|---------|-----------|----------|----------------|----|---------|---------|-------|---------|--------|
| treat  | 1:IBOP  | 2:LTD     | 0.06221  | 0.1588         | 25 | 0.39    | 0.6986  | 0.05  | -0.2649 | 0.3893 |
| treat  | 1:IBOP  | 3:PGE     | -0.1067  | 0.1588         | 25 | -0.67   | 0.5079  | 0.05  | -0.4338 | 0.2204 |
| treat  | 1:IBOP  | 4:I+L+P   | -0.05548 | 0.1588         | 25 | -0.35   | 0.7297  | 0.05  | -0.3825 | 0.2716 |
| treat  | 1:IBOP  | 9:Control | 0.7321   | 0.1700         | 25 | 4.31    | 0.0002  | 0.05  | 0.3819  | 1.0823 |
| treat  | 2:LTD   | 3:PGE     | -0.1689  | 0.1588         | 25 | -1.06   | 0.2977  | 0.05  | -0.4960 | 0.1582 |
| treat  | 2:LTD   | 4:I+L+P   | -0.1177  | 0.1588         | 25 | -0.74   | 0.4655  | 0.05  | -0.4448 | 0.2094 |
| treat  | 2:LTD   | 9:Control | 0.6699   | 0.1700         | 25 | 3.94    | 0.0006  | 0.05  | 0.3197  | 1.0201 |
| treat  | 3:PGE   | 4:I+L+P   | 0.05121  | 0.1588         | 25 | 0.32    | 0.7498  | 0.05  | -0.2759 | 0.3783 |
| treat  | 3:PGE   | 9:Control | 0.8388   | 0.1700         | 25 | 4.93    | <.0001  | 0.05  | 0.4886  | 1.1890 |
| treat  | 4:I+L+P | 9:Control | 0.7876   | 0.1700         | 25 | 4.63    | <.0001  | 0.05  | 0.4374  | 1.1378 |

**Figure 5B. Differences of Least Squares Means**

| Effect | treat     | _treat    | Estimate | Standard Error | DF | t Value | Pr >  t | Alpha | Lower   | Upper    |
|--------|-----------|-----------|----------|----------------|----|---------|---------|-------|---------|----------|
| treat  | 1:IBOP    | 2:LTD     | -0.03695 | 0.3678         | 25 | -0.10   | 0.9208  | 0.05  | -0.7944 | 0.7205   |
| treat  | 1:IBOP    | 3:PGE     | -0.3674  | 0.3678         | 25 | -1.00   | 0.3274  | 0.05  | -1.1249 | 0.3901   |
| treat  | 1:IBOP    | 9:Control | 0.8903   | 0.3737         | 25 | 2.38    | 0.0251  | 0.05  | 0.1206  | 1.6599   |
| treat  | 1:IBOP    | I+L+P     | 0.05848  | 0.3678         | 25 | 0.16    | 0.8750  | 0.05  | -0.6990 | 0.8159   |
| treat  | 2:LTD     | 3:PGE     | -0.3304  | 0.3678         | 25 | -0.90   | 0.3775  | 0.05  | -1.0879 | 0.4270   |
| treat  | 2:LTD     | 9:Control | 0.9272   | 0.3737         | 25 | 2.48    | 0.0202  | 0.05  | 0.1575  | 1.6969   |
| treat  | 2:LTD     | I+L+P     | 0.09542  | 0.3678         | 25 | 0.26    | 0.7974  | 0.05  | -0.6620 | 0.8529   |
| treat  | 3:PGE     | 9:Control | 1.2577   | 0.3737         | 25 | 3.37    | 0.0025  | 0.05  | 0.4880  | 2.0273   |
| treat  | 3:PGE     | I+L+P     | 0.4259   | 0.3678         | 25 | 1.16    | 0.2578  | 0.05  | -0.3316 | 1.1833   |
| treat  | 9:Control | I+L+P     | -0.8318  | 0.3737         | 25 | -2.23   | 0.0353  | 0.05  | -1.6015 | -0.06210 |

**Figure 5C. Differences of Least Squares Means**

| Effect | treat         | _treat        | Estimate | Standard Error | DF | t Value | Pr >  t | Alpha | Lower   | Upper   |
|--------|---------------|---------------|----------|----------------|----|---------|---------|-------|---------|---------|
| treat  | 5:I Lo        | 6:P Lo        | 0.1711   | 0.2394         | 38 | 0.71    | 0.4793  | 0.05  | -0.3136 | 0.6557  |
| treat  | 5:I Lo        | 7:I Hi        | -0.9561  | 0.2631         | 38 | -3.63   | 0.0008  | 0.05  | -1.4887 | -0.4234 |
| treat  | 5:I Lo        | 8:I Lo + P Lo | -0.8797  | 0.2704         | 38 | -3.25   | 0.0024  | 0.05  | -1.4271 | -0.3324 |
| treat  | 5:I Lo        | 9:Control     | 0.9780   | 0.2708         | 38 | 3.61    | 0.0009  | 0.05  | 0.4298  | 1.5261  |
| treat  | 6:P Lo        | 7:I Hi        | -1.1271  | 0.2390         | 38 | -4.72   | <.0001  | 0.05  | -1.6109 | -0.6433 |
| treat  | 6:P Lo        | 8:I Lo + P Lo | -1.0508  | 0.2650         | 38 | -3.97   | 0.0003  | 0.05  | -1.5872 | -0.5144 |
| treat  | 6:P Lo        | 9:Control     | 0.8069   | 0.2916         | 38 | 2.77    | 0.0087  | 0.05  | 0.2166  | 1.3972  |
| treat  | 7:I Hi        | 8:I Lo + P Lo | 0.07633  | 0.2409         | 38 | 0.32    | 0.7531  | 0.05  | -0.4113 | 0.5639  |
| treat  | 7:I Hi        | 9:Control     | 1.9340   | 0.2959         | 38 | 6.54    | <.0001  | 0.05  | 1.3349  | 2.5331  |
| treat  | 8:I Lo + P Lo | 9:Control     | 1.8577   | 0.2992         | 38 | 6.21    | <.0001  | 0.05  | 1.2519  | 2.4634  |

| <b>Figure 6A. One-way analysis of variance</b> |            |          |                 |                    |  |
|------------------------------------------------|------------|----------|-----------------|--------------------|--|
| P value                                        | P<0.0001   |          |                 |                    |  |
| P value summary                                | ***        |          |                 |                    |  |
| Are means signif. different? (P < 0.05)        | Yes        |          |                 |                    |  |
| Number of groups                               | 4          |          |                 |                    |  |
| F                                              | 22.54      |          |                 |                    |  |
| R squared                                      | 0.8601     |          |                 |                    |  |
| ANOVA Table                                    |            |          |                 |                    |  |
|                                                | SS         | df       | MS              |                    |  |
| Treatment (between columns)                    | 1.574      | 3        | 0.5248          |                    |  |
| Residual (within columns)                      | 0.2561     | 11       | 0.02328         |                    |  |
| Total                                          | 1.83       | 14       |                 |                    |  |
| Tukey's Multiple Comparison Test               |            |          |                 |                    |  |
|                                                | Mean Diff. | q        | P value         | 95% CI of diff     |  |
| WT 1.5 vs Tg 1.5                               | 0.1628     | 1.975    | P > 0.05        | -0.1879 to 0.5135  |  |
| WT 1.5 vs WT 6.5                               | -0.1473    | 1.788    | P > 0.05        | -0.4980 to 0.2034  |  |
| WT 1.5 vs Tg 6.5                               | -0.6807    | 8.261    | P < 0.001       | -1.031 to -0.3300  |  |
| Tg 1.5 vs WT 6.5                               | -0.3101    | 4.065    | P > 0.05        | -0.6347 to 0.01461 |  |
| Tg 1.5 vs Tg 6.5                               | -0.8435    | 11.06    | P < 0.001       | -1.168 to -0.5188  |  |
| WT 6.5 vs Tg 6.5                               | -0.5334    | 6.993    | P < 0.01        | -0.8581 to -0.2088 |  |
| <b>Figure 6B. One-way analysis of variance</b> |            |          |                 |                    |  |
| P value                                        | 0.0019     |          |                 |                    |  |
| P value summary                                | **         |          |                 |                    |  |
| Are means signif. different? (P < 0.05)        | Yes        |          |                 |                    |  |
| Number of groups                               | 4          |          |                 |                    |  |
| F                                              | 10.64      |          |                 |                    |  |
| R squared                                      | 0.7615     |          |                 |                    |  |
| ANOVA Table                                    |            |          |                 |                    |  |
|                                                | SS         | df       | MS              |                    |  |
| Treatment (between columns)                    | 1.994      | 3        | 0.6646          |                    |  |
| Residual (within columns)                      | 0.6245     | 10       | 0.06245         |                    |  |
| Total                                          | 2.618      | 13       |                 |                    |  |
| Tukey's Multiple Comparison Test               |            |          |                 |                    |  |
|                                                | Mean Diff. | q        | P value         | 95% CI of diff     |  |
| WT 1.5 vs Tg 1.5                               | -0.1256    | 0.8708   | P > 0.05        | -0.7499 to 0.4986  |  |
| WT 1.5 vs WT 6.5                               | 0.2013     | 1.492    | P > 0.05        | -0.3827 to 0.7853  |  |
| WT 1.5 vs Tg 6.5                               | -0.7515    | 5.568    | P < 0.05        | -1.335 to -0.1675  |  |
| Tg 1.5 vs WT 6.5                               | 0.3269     | 2.422    | P > 0.05        | -0.2570 to 0.9109  |  |
| Tg 1.5 vs Tg 6.5                               | -0.6258    | 4.637    | P < 0.05        | -1.210 to -0.04187 |  |
| WT 6.5 vs Tg 6.5                               | -0.9528    | 7.625    | P < 0.01        | -1.493 to -0.4121  |  |
| <b>Figure 6C. Two-Tailed Unpaired T-Test</b>   |            |          |                 |                    |  |
|                                                | P value    | t, df    | F-test variance | p value            |  |
| Cortex 1.5 M vs. 6.0 M                         | 0.0329     | 2.575, 8 | 0.131           |                    |  |
| Hippo 1.5 M vs. 6.0 M                          | 0.0431     | 2.401, 8 | 0.134           |                    |  |

| Figure 7A             |  | Two-Tailed Unpaired T-Test |           |                         |  |
|-----------------------|--|----------------------------|-----------|-------------------------|--|
|                       |  | P value                    | t, df     | F-test variance p value |  |
| APP 1.5M vs 6.0M      |  | 0.9334                     | 0.0862, 8 | 0.128                   |  |
| COOH-APP 1.5M vs 6.0M |  | 0.0348                     | 2.539, 8  | <0.0001                 |  |

  

| Figure 7B             |  | Two-Tailed Unpaired T-Test |          |                         |  |
|-----------------------|--|----------------------------|----------|-------------------------|--|
|                       |  | P value                    | t, df    | F-test variance p value |  |
| APP 1.5M vs 6.0M      |  | 0.2908                     | 1.131, 8 | 0.791                   |  |
| COOH-APP 1.5M vs 6.0M |  | 0.0013                     | 4.805, 8 | 0.004                   |  |

| Figure 8A. One-way analysis of variance    |          |            |           |                   |                |
|--------------------------------------------|----------|------------|-----------|-------------------|----------------|
| P value                                    | P<0.0001 |            |           |                   |                |
| P value summary                            | ***      |            |           |                   |                |
| Are means signif. different? (P < 0.05)    | Yes      |            |           |                   |                |
| Number of groups                           | 3        |            |           |                   |                |
| F                                          | 14       |            |           |                   |                |
| R squared                                  | 0.4445   |            |           |                   |                |
| Bartlett's test for equal variances        |          |            |           |                   |                |
| Bartlett's statistic (corrected)           | 5.573    |            |           |                   |                |
| P value                                    | 0.0616   |            |           |                   |                |
| P value summary                            | ns       |            |           |                   |                |
| Do the variances differ signif. (P < 0.05) | No       |            |           |                   |                |
| ANOVA Table                                |          | SS         | df        | MS                |                |
| Treatment (between columns)                | 1.2      | 2          | 0.6001    |                   |                |
| Residual (within columns)                  | 1.5      | 35         | 0.04286   |                   |                |
| Total                                      | 2.7      | 37         |           |                   |                |
| Tukey's Multiple Comparison Test           |          | Mean Diff. | q         | P value           | 95% CI of diff |
| Vehicle vs COX                             | 0.3048   | 5.188      | P < 0.01  | 0.1013 to 0.5084  |                |
| Vehicle vs COX/Licof                       | 0.3959   | 6.737      | P < 0.001 | 0.1923 to 0.5994  |                |
| COX vs COX/Licof                           | 0.09102  | 1.319      | P > 0.05  | -0.1480 to 0.3301 |                |
| Figure 8B. One-way analysis of variance    |          |            |           |                   |                |
| P value                                    | P<0.0001 |            |           |                   |                |
| P value summary                            | ***      |            |           |                   |                |
| Are means signif. different? (P < 0.05)    | Yes      |            |           |                   |                |
| Number of groups                           | 3        |            |           |                   |                |
| F                                          | 13.04    |            |           |                   |                |
| R squared                                  | 0.427    |            |           |                   |                |
| Bartlett's test for equal variances        |          |            |           |                   |                |
| Bartlett's statistic (corrected)           | 9.381    |            |           |                   |                |
| P value                                    | 0.0092   |            |           |                   |                |
| P value summary                            | **       |            |           |                   |                |
| Do the variances differ signif. (P < 0.05) | Yes      |            |           |                   |                |
| ANOVA Table                                |          | SS         | df        | MS                |                |
| Treatment (between columns)                | 1.474    | 2          | 0.7369    |                   |                |
| Residual (within columns)                  | 1.978    | 35         | 0.05651   |                   |                |
| Total                                      | 3.452    | 37         |           |                   |                |
| Tukey's Multiple Comparison Test           |          | Mean Diff. | q         | P value           | 95% CI of diff |
| Vehicle vs COX                             | 0.3501   | 5.19       | P < 0.01  | 0.1164 to 0.5839  |                |
| Vehicle vs COX/Licof                       | 0.4308   | 6.386      | P < 0.001 | 0.1971 to 0.6645  |                |
| COX vs COX/Licof                           | 0.08069  | 1.018      | P > 0.05  | -0.1938 to 0.3552 |                |



**Supplemental Figure 1A. Differences of Least Squares Means**

| Effect | treat   | _treat    | Estimate | Standard Error | DF | t Value | Pr >  t | Alpha | Lower   | Upper    |
|--------|---------|-----------|----------|----------------|----|---------|---------|-------|---------|----------|
| treat  | 1:G0    | 2:Y       | -0.8378  | 0.3461         | 16 | -2.42   | 0.0277  | 0.05  | -1.5714 | -0.1042  |
| treat  | 1:G0    | 3:G + Y   | -0.2531  | 0.3461         | 16 | -0.73   | 0.4750  | 0.05  | -0.9868 | 0.4805   |
| treat  | 1:G0    | 4:Vehicle | -1.0136  | 0.3038         | 16 | -3.34   | 0.0042  | 0.05  | -1.6576 | -0.3695  |
| treat  | 2:Y     | 3:G + Y   | 0.5847   | 0.3815         | 16 | 1.53    | 0.1449  | 0.05  | -0.2241 | 1.3934   |
| treat  | 2:Y     | 4:Vehicle | -0.1758  | 0.3461         | 16 | -0.51   | 0.6185  | 0.05  | -0.9094 | 0.5579   |
| treat  | 3:G + Y | 4:Vehicle | -0.7604  | 0.3461         | 16 | -2.20   | 0.0431  | 0.05  | -1.4940 | -0.02679 |

**Supplemental Figure 1B. Differences of Least Squares Means**

| Effect | treat   | _treat    | Estimate | Standard Error | DF | t Value | Pr >  t | Alpha | Lower    | Upper   |
|--------|---------|-----------|----------|----------------|----|---------|---------|-------|----------|---------|
| treat  | 1:G0    | 2:Y       | -0.4057  | 0.1966         | 16 | -2.06   | 0.0556  | 0.05  | -0.8223  | 0.01103 |
| treat  | 1:G0    | 3:G + Y   | -0.02015 | 0.2217         | 16 | -0.09   | 0.9287  | 0.05  | -0.4901  | 0.4498  |
| treat  | 1:G0    | 4:Vehicle | -0.5893  | 0.1932         | 16 | -3.05   | 0.0076  | 0.05  | -0.9989  | -0.1797 |
| treat  | 2:Y     | 3:G + Y   | 0.3855   | 0.2158         | 16 | 1.79    | 0.0930  | 0.05  | -0.07193 | 0.8429  |
| treat  | 2:Y     | 4:Vehicle | -0.1837  | 0.1843         | 16 | -1.00   | 0.3339  | 0.05  | -0.5744  | 0.2071  |
| treat  | 3:G + Y | 4:Vehicle | -0.5692  | 0.2121         | 16 | -2.68   | 0.0163  | 0.05  | -1.0188  | -0.1195 |

**Supplemental Figure 1C. Differences of Least Squares Means**

| Effect | treat   | _treat    | Estimate | Standard Error | DF | t Value | Pr >  t | Alpha | Lower   | Upper    |
|--------|---------|-----------|----------|----------------|----|---------|---------|-------|---------|----------|
| treat  | 1:G0    | 2:Y       | -0.2682  | 0.1174         | 43 | -2.28   | 0.0273  | 0.05  | -0.5050 | -0.03144 |
| treat  | 1:G0    | 3:G + Y   | 0.05302  | 0.1345         | 43 | 0.39    | 0.6953  | 0.05  | -0.2182 | 0.3242   |
| treat  | 1:G0    | 4:Vehicle | -0.3535  | 0.1140         | 43 | -3.10   | 0.0034  | 0.05  | -0.5835 | -0.1236  |
| treat  | 2:Y     | 3:G + Y   | 0.3213   | 0.1354         | 43 | 2.37    | 0.0222  | 0.05  | 0.04812 | 0.5944   |
| treat  | 2:Y     | 4:Vehicle | -0.08531 | 0.1174         | 43 | -0.73   | 0.4715  | 0.05  | -0.3221 | 0.1515   |
| treat  | 3:G + Y | 4:Vehicle | -0.4066  | 0.1345         | 43 | -3.02   | 0.0042  | 0.05  | -0.6777 | -0.1354  |

**Supplemental Figure 2. Differences of Least Squares Means**

| Effect | treat | _treat  | Estimate | Standard Error | DF | t Value | Pr >  t | Alpha | Lower   | Upper   |
|--------|-------|---------|----------|----------------|----|---------|---------|-------|---------|---------|
| treat  | 1:E   | 2:A     | 14.3694  | 6.3621         | 10 | 2.26    | 0.0475  | 0.05  | 0.1937  | 28.5451 |
| treat  | 1:E   | 3:B     | 31.0915  | 6.3621         | 10 | 4.89    | 0.0006  | 0.05  | 16.9158 | 45.2672 |
| treat  | 1:E   | 4:A + B | 43.9483  | 8.8014         | 10 | 4.99    | 0.0005  | 0.05  | 24.3376 | 63.5590 |
| treat  | 2:A   | 3:B     | 16.7221  | 6.0241         | 10 | 2.78    | 0.0196  | 0.05  | 3.2996  | 30.1446 |
| treat  | 2:A   | 4:A + B | 29.5789  | 8.7217         | 10 | 3.39    | 0.0069  | 0.05  | 10.1457 | 49.0121 |
| treat  | 3:B   | 4:A + B | 12.8568  | 8.7217         | 10 | 1.47    | 0.1712  | 0.05  | -6.5764 | 32.2900 |

| <b>Supplemental Figure 3B. Two-Tailed Unpaired T-Test</b> |  |         |          |                         |  |
|-----------------------------------------------------------|--|---------|----------|-------------------------|--|
|                                                           |  | P value | t, df    | F-test variance p value |  |
| Cortex 1.5M vs 6.0M                                       |  | 0.0395  | 2.456, 8 | 0.293                   |  |
| Hippo 1.5M vs 6.0M                                        |  | 0.0056  | 3.747, 8 | 0.879                   |  |

| <b>Supplemental Figure 6A. Two-Tailed Unpaired T-Test</b> |  |         |           |                         |  |
|-----------------------------------------------------------|--|---------|-----------|-------------------------|--|
|                                                           |  | P value | t, df     | F-test variance p value |  |
| Vehicle vs Licof                                          |  | 0.0116  | 2.975, 12 | 0.189                   |  |

| <b>Supplemental Figure 6B. Two-Tailed Unpaired T-Test</b> |  |         |           |                         |  |
|-----------------------------------------------------------|--|---------|-----------|-------------------------|--|
|                                                           |  | P value | t, df     | F-test variance p value |  |
| Vehicle vs Licof                                          |  | 0.0003  | 4.965, 12 | 0.997                   |  |

| <b>Supplemental Figure 7A. Two-Tailed Unpaired T-Test</b> |  |         |            |                         |  |
|-----------------------------------------------------------|--|---------|------------|-------------------------|--|
|                                                           |  | P value | t, df      | F-test variance p value |  |
| APP Vehicle vs COX/Licof                                  |  | 0.6747  | 0.4270, 17 | 0.266                   |  |
| COOH-APP Vehicle vs COX/Licof                             |  | 0.0038  | 3.355, 17  | 0.059                   |  |

| <b>Supplemental Figure 7B. Two-Tailed Unpaired T-Test</b> |  |         |            |                         |  |
|-----------------------------------------------------------|--|---------|------------|-------------------------|--|
|                                                           |  | P value | t, df      | F-test variance p value |  |
| APP Vehicle vs COX/Licof                                  |  | 0.6167  | 0.5098, 17 | 0.005                   |  |
| COOH-APP Vehicle vs COX/Licof                             |  | 0.0468  | 2.144, 17  | 0.096                   |  |

| <b>Supplemental Figure 8A. One-way analysis of variance</b> |            |        |          |                   |
|-------------------------------------------------------------|------------|--------|----------|-------------------|
| P value                                                     | 0.1765     |        |          |                   |
| P value summary                                             | ns         |        |          |                   |
| Are means signif. different? (P < 0.05)                     | No         |        |          |                   |
| Number of groups                                            | 3          |        |          |                   |
| F                                                           | 1.86       |        |          |                   |
| R squared                                                   | 0.1296     |        |          |                   |
| Bartlett's test for equal variances                         |            |        |          |                   |
| Bartlett's statistic (corrected)                            | 1          |        |          |                   |
| P value                                                     | 0.6065     |        |          |                   |
| P value summary                                             | ns         |        |          |                   |
| Do the variances differ signif. (P < 0.05)                  | No         |        |          |                   |
| ANOVA Table                                                 |            |        |          |                   |
| Treatment (between columns)                                 | SS         | df     | MS       |                   |
|                                                             | 1.098      | 2      | 0.5492   |                   |
| Residual (within columns)                                   | 7.38       | 25     | 0.2952   |                   |
| Total                                                       | 8.478      | 27     |          |                   |
| Dunnett's Multiple Comparison Test                          |            |        |          |                   |
|                                                             | Mean Diff. | q      | P value  | 95% CI of diff    |
| Vehicle vs COX                                              | 0.4422     | 1.771  | P > 0.05 | -0.1432 to 1.028  |
| Vehicle vs COX + Licof                                      | 0.0416     | 0.1666 | P > 0.05 | -0.5438 to 0.6270 |
| <b>Supplemental Figure 8B. One-way analysis of variance</b> |            |        |          |                   |
| P value                                                     | 0.1476     |        |          |                   |
| P value summary                                             | ns         |        |          |                   |
| Are means signif. different? (P < 0.05)                     | No         |        |          |                   |
| Number of groups                                            | 3          |        |          |                   |
| F                                                           | 2.067      |        |          |                   |
| R squared                                                   | 0.1419     |        |          |                   |
| Bartlett's test for equal variances                         |            |        |          |                   |
| Bartlett's statistic (corrected)                            | 3.581      |        |          |                   |
| P value                                                     | 0.1669     |        |          |                   |
| P value summary                                             | ns         |        |          |                   |
| Do the variances differ signif. (P < 0.05)                  | No         |        |          |                   |
| ANOVA Table                                                 |            |        |          |                   |
| Treatment (between columns)                                 | SS         | df     | MS       |                   |
|                                                             | 1.008      | 2      | 0.5042   |                   |
| Residual (within columns)                                   | 6.098      | 25     | 0.2439   |                   |
| Total                                                       | 7.106      | 27     |          |                   |
| Tukey's Multiple Comparison Test                            |            |        |          |                   |
|                                                             | Mean Diff. | q      | P value  | 95% CI of diff    |
| Vehicle vs COX                                              | 0.1864     | 1.162  | P > 0.05 | -0.3791 to 0.7519 |
| Vehicle vs COX + Licof                                      | -0.2834    | 1.766  | P > 0.05 | -0.8489 to 0.2821 |
| COX vs COX + Licof                                          | -0.4698    | 2.854  | P > 0.05 | -1.050 to 0.1104  |

| <b>Supplemental Table 4 (Drinking Water). One-way analysis of variance</b> |            |       |           |                 |
|----------------------------------------------------------------------------|------------|-------|-----------|-----------------|
| P value                                                                    | P<0.0001   |       |           |                 |
| P value summary                                                            | ***        |       |           |                 |
| Are means signif. different? (P < 0.05)                                    | Yes        |       |           |                 |
| Number of groups                                                           | 3          |       |           |                 |
| F                                                                          | 39.55      |       |           |                 |
| R squared                                                                  | 0.7526     |       |           |                 |
| Bartlett's test for equal variances                                        |            |       |           |                 |
| Bartlett's statistic (corrected)                                           | 39.04      |       |           |                 |
| P value                                                                    | P<0.0001   |       |           |                 |
| P value summary                                                            | ***        |       |           |                 |
| Do the variances differ signif. (P < 0.05)                                 | Yes        |       |           |                 |
| ANOVA Table                                                                |            |       |           |                 |
| Treatment (between columns)                                                | SS         | df    | MS        |                 |
|                                                                            | 227.3      | 2     | 113.7     |                 |
| Residual (within columns)                                                  | 74.71      | 26    | 2.874     |                 |
| Total                                                                      | 302        | 28    |           |                 |
| Tukey's Multiple Comparison Test                                           |            |       |           |                 |
|                                                                            | Mean Diff. | q     | P value   | 95% CI of diff  |
| Vehicle vs COX                                                             | 2.53       | 4.697 | P < 0.01  | 0.6357 to 4.425 |
| Vehicle vs COX/LOX                                                         | 6.753      | 12.53 | P < 0.001 | 4.858 to 8.647  |
| COX vs COX/LOX                                                             | 4.222      | 7.472 | P < 0.001 | 2.235 to 6.209  |

| <b>Supplemental Table 4 (Change in Body Weight). One-way analysis of variance</b> |        |    |       |
|-----------------------------------------------------------------------------------|--------|----|-------|
| P value                                                                           | 0.2538 |    |       |
| P value summary                                                                   | ns     |    |       |
| Are means signif. different? (P < 0.05)                                           | No     |    |       |
| Number of groups                                                                  | 3      |    |       |
| F                                                                                 | 1.446  |    |       |
| R squared                                                                         | 0.1001 |    |       |
| Bartlett's test for equal variances                                               |        |    |       |
| Bartlett's statistic (corrected)                                                  | 3.604  |    |       |
| P value                                                                           | 0.1649 |    |       |
| P value summary                                                                   | ns     |    |       |
| Do the variances differ signif. (P < 0.05)                                        | No     |    |       |
| ANOVA Table                                                                       |        |    |       |
|                                                                                   | SS     | df | MS    |
| Treatment (between columns)                                                       | 5.495  | 2  | 2.747 |
| Residual (within columns)                                                         | 49.39  | 26 | 1.900 |
| Total                                                                             | 54.89  | 28 |       |
| <b>Supplemental Table 4 (Starting Body Weight). One-way analysis of variance</b>  |        |    |       |
| P value                                                                           | 0.1418 |    |       |
| P value summary                                                                   | ns     |    |       |
| Are means signif. different? (P < 0.05)                                           | No     |    |       |
| Number of groups                                                                  | 3      |    |       |
| F                                                                                 | 2.108  |    |       |
| R squared                                                                         | 0.1395 |    |       |
| Bartlett's test for equal variances                                               |        |    |       |
| Bartlett's statistic (corrected)                                                  | 1.632  |    |       |
| P value                                                                           | 0.4423 |    |       |
| P value summary                                                                   | ns     |    |       |
| Do the variances differ signif. (P < 0.05)                                        | No     |    |       |
| ANOVA Table                                                                       |        |    |       |
|                                                                                   | SS     | df | MS    |
| Treatment (between columns)                                                       | 150.3  | 2  | 75.17 |
| Residual (within columns)                                                         | 927.1  | 26 | 35.66 |
| Total                                                                             | 1077   | 28 |       |
| <b>Supplemental Table 4 (Ending Body Weight). One-way analysis of variance</b>    |        |    |       |
| P value                                                                           | 0.0923 |    |       |
| P value summary                                                                   | ns     |    |       |
| Are means signif. different? (P < 0.05)                                           | No     |    |       |
| Number of groups                                                                  | 3      |    |       |
| F                                                                                 | 2.615  |    |       |
| R squared                                                                         | 0.1675 |    |       |
| Bartlett's test for equal variances                                               |        |    |       |
| Bartlett's statistic (corrected)                                                  | 2.503  |    |       |
| P value                                                                           | 0.2861 |    |       |
| P value summary                                                                   | ns     |    |       |
| Do the variances differ signif. (P < 0.05)                                        | No     |    |       |
| ANOVA Table                                                                       |        |    |       |
|                                                                                   | SS     | df | MS    |
| Treatment (between columns)                                                       | 180.9  | 2  | 90.45 |
| Residual (within columns)                                                         | 899.1  | 26 | 34.58 |
| Total                                                                             | 1080   | 28 |       |
